# Supplementary material for: Reduced toxicity in the treatment of locally advanced rectal cancer: a comparison of volumetric modulated arc therapy and 3D conformal radiotherapy
Source: PubMed Central journal article supplement (PMC4617910; doi:10.1186/s12885-015-1812-x), 2015-10-20
Supplement: 12885_2015_1812_MOESM1_ESM.pdf [file 12885_2015_1812_MOESM1_ESM.pdf]

**Additional Table 1. Hematotoxicity**

| Toxicity grade                           | 3D conformal radiotherapy |    | Volumetric modulated arc therapy |    | Chi-square, p | Kruskal-Wallis, p |
|------------------------------------------|---------------------------|----|----------------------------------|----|---------------|-------------------|
|                                          | No.                       | %  | No.                              | %  |               |                   |
| <b>Anemia</b>                            |                           |    |                                  |    |               |                   |
| ≥ 3                                      | 1                         | 1  | 1                                | 1  | 0.8426        | 0.2417            |
| 0                                        | 51                        | 48 | 30                               | 37 |               |                   |
| 1                                        | 44                        | 41 | 45                               | 56 |               |                   |
| 2                                        | 11                        | 10 | 5                                | 6  |               |                   |
| 3                                        | 1                         | 1  | 1                                | 1  |               |                   |
| <b>Leucopenia</b>                        |                           |    |                                  |    |               |                   |
| ≥ 3                                      | 3                         | 3  | 1                                | 1  | 0.4603        | 0.3640            |
| 0                                        | 52                        | 49 | 31                               | 38 |               |                   |
| 1                                        | 44                        | 41 | 39                               | 48 |               |                   |
| 2                                        | 8                         | 8  | 10                               | 12 |               |                   |
| 3                                        | 2                         | 2  | 0                                | 0  |               |                   |
| 4                                        | 1                         | 1  | 1                                | 1  |               |                   |
| <b>Thrombopenia</b>                      |                           |    |                                  |    |               |                   |
| ≥ 3                                      | 1                         | 1  | 0                                | 0  | 0.3830        | 0.6186            |
| 0                                        | 89                        | 83 | 66                               | 82 |               |                   |
| 1                                        | 17                        | 16 | 15                               | 19 |               |                   |
| 4                                        | 1                         | 1  | 0                                | 0  |               |                   |
| <b>Any kind of hematologic toxicity*</b> |                           |    |                                  |    |               |                   |
| ≥ 3                                      | 4                         | 4  | 2                                | 3  | 0.6240        | 0.4010            |
| 0                                        | 29                        | 27 | 13                               | 16 |               |                   |
| 1                                        | 58                        | 54 | 52                               | 64 |               |                   |
| 2                                        | 16                        | 15 | 14                               | 17 |               |                   |
| 3                                        | 3                         | 3  | 1                                | 1  |               |                   |
| 4                                        | 1                         | 1  | 1                                | 1  |               |                   |

\*The highest score of any hematologic toxicity per patient.
